# Supplementary material for: H19 contributes to aerobic glycolysis, proliferation and immune escape of gastric cancer cells via the miR-519d-3p/LDHA axis
Source: Research Square preprint supplement (doi:10.21203/rs.3.rs-97859/v1), 2020-10-29
Supplement: Supplementary file 2 [file d2062defe48877f2c9530ea3.docx]

**Supplementary Table 2：Primer sequences of RT-qPCR**

| **Gene Name** | **Primer Sequence (5’-3’)** |
| --- | --- |
| H19 | F: GGAGTGAATGAGCTCTCAGG |
| R: CTAAGGTGTTCAGGAAGGCC |
| LDHA | F: ATGGCAACTCTAAAGGATCAGC |
| R: CCAACCCCAACAACTGTAATCT |
| LDHB | F: TGGTATGGCGTGTGCTATCAG |
| R: TTGGCGGTCACAGAATAATCTTT |
| GLUT1 | F: GGCCAAGAGTGTGCTAAAGAA |
| R: ACAGCGTTGATGCCAGACAG |
| HK2 | F: GAGCCACCACTCACCCTACT |
| R: CCAGGCATTCGGCAATGTG |
| PKM2 | F: ATGTCGAAGCCCCATAGTGAA |
| R: TGGGTGGTGAATCAATGTCCA |
| PDK1 | F: CTGTGATACGGATCAGAAACCG |
| R: TCCACCAAACAATAAAGAGTGCT |
| ACTIN | F: AAGGAGCCCCACGAGAAAAAT |
| R: ACCGAACTTGCATTGATTCCAG |
| miR-519d-3p | F: ACACTCCAGCTGGGCAAAGTGCCTCCCTTT |
| R: CTCAACTGGTGTCGTGGAGTCGGCAATTCAGTT  GAGCACTCTAA |
| miR-17-5p | F:ACACTCCAGCTGGGCAAAGTGCTTACAGTGC |
| R: CTCAACTGGTGTCGTGGAGTCGGCAATTCAGTT  GAGCTACCTGC |
| miR-216b-5p | F: ACACTCCAGCTGGGAAATCTCTGCAGGCAA |
| R: CTCAACTGGTGTCGTGGAGTCGGCAATTCAGTT  GAGTCACATTT |
| URP | TGGTGTCGTGGAGTCG |
| U6 | F: CTCGCTTCGGCAGCACA |
| R: AACGCTTCACGAATTTGCGT |
| NOS2 | F: TTCAGTATCACAACCTCAGCAAG  R: TGGACCTGCAAGTTAAAATCCC |
| CXCL9 | F：GGACTATCCACCTACAATCCTTG  R: TTTTAATCAGTTCCTTCACATCTGC |
| TNF-α | F: GGCTCCAGGCGGTGCTTG  R: CAGATAGATGGGCTCATACCA |
| HLA-DR | F: ATCATGACAAAGCGCTCCAACTAT  R: GATGCCCACCAGACCCACAG |
| ARG1 | F: GTGGAAACTTGCATGGACAAC  R: AATCCTGGCACATCGGGAATC |
| TGF-β | F: GGCCAGATCCTGTCCAAGC  R: GTGGGTTTCCACCATTAGCAC |
